# Supplementary material for: Pan-genomic and genetic dissection of drought tolerance in a resilient wheat germplasm JIN50
Source: Research Square preprint supplement (doi:10.21203/rs.3.rs-6539185/v1), 2025-05-16
Supplement: Supplementary file 1 [file 86d33de590d871d5982d4283.xlsx]

## Sheet: Supplementary Table 1
Supplementary Table 1 Summary of the TEs in JM50 genome																		Supplementary Table 1 Summary of the TEs in JIN50 genome
	Type	Number	Length(bp)	Ratio in genome (%)															Type	Number	Length(bp)	Ratio in genome (%)
Class I	LTR retroelement	3693088	9464539139	64.98														Class I	LTR retroelement	3693088	9464539139	64.98
	Gypsy	2414495	6674195992	45.82															Gypsy	2414495	6674195992	45.82
	Copia	969382	2400319789	16.48															Copia	969382	2400319789	16.48
	other	309211	409677382	2.81															other	309211	409677382	2.81
	Non-LTR retrotransposon	559172	235503162	1.62															Non-LTR retrotransposon	559172	235503162	1.62
	LINE	408367	176710408	1.21															LINE	408367	176710408	1.21
	SINE	150805	63410997	0.44															SINE	150805	63410997	0.44
Class II	DNA transposons superfamily	3192205	2529802009	17.37														Class II	DNA transposons superfamily	3192205	2529802009	17.37
	CACTA	115812	26615705	0.18															CACTA	115812	26615705	0.18
	hAT	78269	12477314	0.09															hAT	78269	12477314	0.09
	MULE	35277	7188420	0.05															MULE	35277	7188420	0.05
	PIF/Harbinger	144019	41921599	0.29															PIF/Harbinger	144019	41921599	0.29
	Tc1/Mariner	22592	2144451	0.01															Tc1/Mariner	22592	2144451	0.01
	Ginger	7726	719086	0															Ginger	7726	719086	0
	Helitron	44651	10344331	0.07															Helitron	44651	10344331	0.07
	Maverick	11020	836216	0.01															Maverick	11020	836216	0.01
	other	2732839	2440872919	16.76															other	2732839	2440872919	16.76
Other/Unspecified/Unknown		920070	207479653	1.42														Other/Unspecified/Unknown		920070	207479653	1.42
Total		7904500	12403922637	85.16														Total		7904500	12403922637	85.16

## Sheet: Supplementary Table 2
Supplementary Table 2. Main functional classification of PAV-related genes
Gene related functions	Gene id	Count	GO term
response to abscisic acid	TraesCS1A03G0033800/TraesCS1A03G0023800/TraesCS1A03G0043500/TraesCS1A03G0067500/TraesCS1A03G0253200/TraesCS1A03G0293500/TraesCS1A03G0405100/TraesCS1A03G0405200/TraesCS1A03G0456200/TraesCS1A03G0534000/TraesCS1A03G0538700/TraesCS1A03G0585000/TraesCS1A03G0586800/TraesCS1A03G0587800/TraesCS1A03G0623200/TraesCS1A03G0674500/TraesCS1A03G0702200/TraesCS1A03G0743700/TraesCS1A03G0772300/TraesCS1A03G0892100…	329	GO:0009737
response to salt stress	TraesCS1A03G0033800/TraesCS1A03G0043500/TraesCS1A03G0049100/TraesCS1A03G0069000/TraesCS1A03G0316200/TraesCS1A03G0405100/TraesCS1A03G0405200/TraesCS1A03G0405700/TraesCS1A03G0416900/TraesCS1A03G0456200/TraesCS1A03G0478300/TraesCS1A03G0499400/TraesCS1A03G0503000/TraesCS1A03G0525100/TraesCS1A03G0572600/TraesCS1A03G0584500/TraesCS1A03G0580100/TraesCS1A03G0623200/TraesCS1A03G0623300/TraesCS1A03G0630900…	318	GO:0009651
carbohydrate metabolic process	TraesCS1A03G0013100/TraesCS1A03G0054800/TraesCS1A03G0110100/TraesCS1A03G0121000/TraesCS1A03G0155800/TraesCS1A03G0205300/TraesCS1A03G0565200/TraesCS1A03G0608300/TraesCS1A03G0692100/TraesCS1A03G0697800/TraesCS1A03G0873100/TraesCS1A03G0872300/TraesCS1A03G0952700/TraesCS1A03G1008400/TraesCS1A03G1026800/TraesCS1A03G1083600/TraesCS2A03G0027200/TraesCS2A03G0073800/TraesCS2A03G0077000/TraesCS2A03G0077600…	312	GO:0005975
ubiquitin-dependent protein catabolic process	TraesCS1A03G0014500/TraesCS1A03G0218100/TraesCS1A03G0218200/TraesCS1A03G0357800/TraesCS1A03G0456200/TraesCS1A03G0516800/TraesCS1A03G0527300/TraesCS1A03G1050900/TraesCS2A03G0178000/TraesCS2A03G0260600/TraesCS2A03G0261100/TraesCS2A03G0264300/TraesCS2A03G0371500/TraesCS2A03G0497100/TraesCS2A03G0784600/TraesCS2A03G1056000/TraesCS2A03G1056600/TraesCS2A03G1057100/TraesCS2A03G1209400/TraesCS2A03G1212600…	288	GO:0006511
response to cold	TraesCS1A03G0049100/TraesCS1A03G0063500/TraesCS1A03G0097100/TraesCS1A03G0331900/TraesCS1A03G0416900/TraesCS1A03G0478300/TraesCS1A03G0574000/TraesCS1A03G0588000/TraesCS1A03G0623200/TraesCS1A03G0623300/TraesCS1A03G0717000/TraesCS1A03G0712300/TraesCS1A03G0712400/TraesCS1A03G0720200/TraesCS1A03G0872300/TraesCS1A03G0992500/TraesCS1A03G1008400/TraesCS1A03G1009900/TraesCS1A03G1066900/TraesCS2A03G0194000…	283	GO:0009409
response to osmotic stress	TraesCS1A03G0043500/TraesCS1A03G0172800/TraesCS1A03G0173200/TraesCS1A03G0173700/TraesCS1A03G0316200/TraesCS1A03G0499400/TraesCS1A03G0525100/TraesCS1A03G0538400/TraesCS1A03G0552200/TraesCS1A03G0623200/TraesCS1A03G0772300/TraesCS1A03G0892100/TraesCS1A03G0919500/TraesCS1A03G0992500/TraesCS1A03G1040400/TraesCS2A03G0082700/TraesCS2A03G0464100/TraesCS2A03G0616900/TraesCS2A03G0812400/TraesCS2A03G0894400…	283	GO:0006970
positive regulation of transcription, DNA-templated	TraesCS1A03G0043500/TraesCS1A03G0324400/TraesCS1A03G0462000/TraesCS1A03G0580100/TraesCS1A03G0588000/TraesCS1A03G0592800/TraesCS1A03G0632200/TraesCS1A03G0717000/TraesCS1A03G0728800/TraesCS1A03G0743700/TraesCS1A03G0953400/TraesCS1A03G1006100/TraesCS2A03G0063100/TraesCS2A03G0079200/TraesCS2A03G0134600/TraesCS2A03G0155500/TraesCS2A03G0225600/TraesCS2A03G0288200/TraesCS2A03G0338900/TraesCS2A03G0774800…	279	GO:0045893
plant-type hypersensitive response	TraesCS1A03G0012700/TraesCS1A03G0042800/TraesCS1A03G0065600/TraesCS1A03G0070500/TraesCS1A03G0059400/TraesCS1A03G0060600/TraesCS1A03G0093500/TraesCS1A03G0148200/TraesCS1A03G0409400/TraesCS1A03G0706000/TraesCS1A03G0796400/TraesCS1A03G0954800/TraesCS1A03G1043900/TraesCS1A03G1045200/TraesCS2A03G0088700/TraesCS2A03G0138700/TraesCS2A03G0138800/TraesCS2A03G0474500/TraesCS2A03G0497100/TraesCS2A03G0817000…	272	GO:0009626
response to oxidative stress	TraesCS1A03G0190400/TraesCS1A03G0253200/TraesCS1A03G0451300/TraesCS1A03G0478300/TraesCS1A03G0529100/TraesCS1A03G0535100/TraesCS1A03G0542800/TraesCS1A03G0572600/TraesCS1A03G0584500/TraesCS1A03G0720200/TraesCS1A03G0757000/TraesCS1A03G0757100/TraesCS1A03G0790200/TraesCS1A03G0810700/TraesCS1A03G0845000/TraesCS1A03G0871400/TraesCS2A03G0046000/TraesCS2A03G0078600/TraesCS2A03G0067700/TraesCS2A03G0181300…	263	GO:0006979
mRNA processing	TraesCS1A03G0501200/TraesCS1A03G0541400/TraesCS1A03G0730700/TraesCS1A03G0818800/TraesCS1A03G0863800/TraesCS1A03G0873000/TraesCS1A03G0992500/TraesCS1A03G1085100/TraesCS2A03G0143100/TraesCS2A03G0192300/TraesCS2A03G0280400/TraesCS2A03G0318200/TraesCS2A03G0320500/TraesCS2A03G0368400/TraesCS2A03G0479400/TraesCS2A03G0502100/TraesCS2A03G0600700/TraesCS2A03G0812400/TraesCS2A03G0825700/TraesCS2A03G0941800…	255	GO:0006397
response to water deprivation	TraesCS1A03G0043500/TraesCS1A03G0049100/TraesCS1A03G0067500/TraesCS1A03G0316200/TraesCS1A03G0359000/TraesCS1A03G0416900/TraesCS1A03G0478300/TraesCS1A03G0525100/TraesCS1A03G0556500/TraesCS1A03G0552200/TraesCS1A03G0580100/TraesCS1A03G0623200/TraesCS1A03G0623300/TraesCS1A03G0712300/TraesCS1A03G0712400/TraesCS1A03G0772300/TraesCS1A03G0992500/TraesCS1A03G1047100/TraesCS2A03G0181300/TraesCS2A03G0194000…	255	GO:0009414
cell division	TraesCS1A03G0016200/TraesCS1A03G0158700/TraesCS1A03G0162400/TraesCS1A03G0174100/TraesCS1A03G0463800/TraesCS1A03G0461600/TraesCS1A03G0510000/TraesCS1A03G0554000/TraesCS1A03G0562200/TraesCS1A03G0572700/TraesCS1A03G0581400/TraesCS1A03G0587900/TraesCS1A03G0634500/TraesCS1A03G0659000/TraesCS1A03G0681700/TraesCS1A03G0768800/TraesCS1A03G0818800/TraesCS1A03G0887800/TraesCS1A03G0899400/TraesCS1A03G0919200…	249	GO:0051301
lipid catabolic process	TraesCS1A03G0007700/TraesCS1A03G0129100/TraesCS1A03G0143500/TraesCS1A03G0263700/TraesCS1A03G0313300/TraesCS1A03G0615300/TraesCS1A03G0670600/TraesCS1A03G0676900/TraesCS1A03G0837800/TraesCS1A03G0923600/TraesCS1A03G0985200/TraesCS1A03G0985300/TraesCS1A03G0998500/TraesCS1A03G1006600/TraesCS1A03G1007800/TraesCS1A03G1008300/TraesCS2A03G0050800/TraesCS2A03G0079000/TraesCS2A03G0244600/TraesCS2A03G0327600…	231	GO:0016042
embryo development ending in seed dormancy	TraesCS1A03G0158700/TraesCS1A03G0249000/TraesCS1A03G0461600/TraesCS1A03G0486200/TraesCS1A03G0497900/TraesCS1A03G0525100/TraesCS1A03G0569500/TraesCS1A03G0587800/TraesCS1A03G0587900/TraesCS1A03G0589800/TraesCS1A03G0592800/TraesCS1A03G0773400/TraesCS1A03G0956000/TraesCS1A03G1052600/TraesCS2A03G0125000/TraesCS2A03G0206700/TraesCS2A03G0245800/TraesCS2A03G0302300/TraesCS2A03G0349600/TraesCS2A03G0522600…	229	GO:0009793
auxin-activated signaling pathway	TraesCS1A03G0483200/TraesCS1A03G0497900/TraesCS1A03G0556500/TraesCS1A03G0585900/TraesCS1A03G0702700/TraesCS1A03G0829100/TraesCS1A03G0966800/TraesCS1A03G1014500/TraesCS2A03G0283700/TraesCS2A03G0386700/TraesCS2A03G0427200/TraesCS2A03G0803000/TraesCS2A03G0835700/TraesCS2A03G1152200/TraesCS2A03G1152800/TraesCS2A03G1177400/TraesCS2A03G1212600/TraesCS2A03G1263300/TraesCS2A03G1288700/TraesCS2A03G1323500…	228	GO:0009734
protein transport	TraesCS1A03G0016400/TraesCS1A03G0073700/TraesCS1A03G0075000/TraesCS1A03G0080900/TraesCS1A03G0273400/TraesCS1A03G0413800/TraesCS1A03G0547800/TraesCS1A03G0549800/TraesCS1A03G0580000/TraesCS1A03G0834600/TraesCS1A03G0891800/TraesCS1A03G0917400/TraesCS2A03G0425400/TraesCS2A03G0501100/TraesCS2A03G0828000/TraesCS2A03G0935700/TraesCS2A03G1051700/TraesCS2A03G1053400/TraesCS2A03G1122400/TraesCS2A03G1165400…	221	GO:0015031
cell differentiation	TraesCS1A03G0048100/TraesCS1A03G0416900/TraesCS1A03G0497900/TraesCS1A03G0554000/TraesCS1A03G0640500/TraesCS1A03G0704500/TraesCS1A03G0706000/TraesCS1A03G0764700/TraesCS1A03G0917700/TraesCS2A03G0134600/TraesCS2A03G0314400/TraesCS2A03G0510300/TraesCS2A03G1055900/TraesCS2A03G1051100/TraesCS2A03G1240400/TraesCS2A03G1240700/TraesCS2A03G1275900/TraesCS3A03G0026700/TraesCS3A03G0088900/TraesCS3A03G0253100…	210	GO:0030154
protein autophosphorylation	TraesCS1A03G0039800/TraesCS1A03G0592000/TraesCS1A03G0672500/TraesCS1A03G0687600/TraesCS1A03G0731100/TraesCS1A03G0763400/TraesCS1A03G0838800/TraesCS1A03G0953400/TraesCS2A03G0309300/TraesCS2A03G0318100/TraesCS2A03G0521900/TraesCS2A03G0558800/TraesCS2A03G0595200/TraesCS2A03G0609700/TraesCS2A03G0673300/TraesCS2A03G0752800/TraesCS2A03G1052500/TraesCS2A03G1090600/TraesCS2A03G1115200/TraesCS2A03G1161800…	207	GO:0046777
cellular response to salt stress	TraesCS1A03G0172800/TraesCS1A03G0173200/TraesCS1A03G0173700/TraesCS1A03G0919500/TraesCS2A03G0464100/TraesCS2A03G0616900/TraesCS2A03G0894400/TraesCS2A03G1105800/TraesCS2A03G1105900/TraesCS2A03G1108300/TraesCS2A03G1108600/TraesCS2A03G1112200/TraesCS2A03G1165500/TraesCS3A03G0021100/TraesCS3A03G0040800/TraesCS3A03G0041100/TraesCS3A03G0042400/TraesCS3A03G0404500/TraesCS3A03G0405500/TraesCS3A03G1142700…	206	GO:0071472
translation	TraesCS1A03G0004000/TraesCS1A03G0028600/TraesCS1A03G0057500/TraesCS1A03G0141300/TraesCS1A03G0273100/TraesCS1A03G0323800/TraesCS1A03G0398000/TraesCS1A03G0423700/TraesCS1A03G0725400/TraesCS1A03G0886600/TraesCS1A03G0947100/TraesCS1A03G0940900/TraesCS1A03G0987600/TraesCS1A03G0974500/TraesCS2A03G0131000/TraesCS2A03G0130900/TraesCS2A03G0224200/TraesCS2A03G0283700/TraesCS2A03G0460000/TraesCS2A03G0569700…	204	GO:0006412
abscisic acid-activated signaling pathway	TraesCS1A03G0043500/TraesCS1A03G0067500/TraesCS1A03G0253200/TraesCS1A03G0293500/TraesCS1A03G0316200/TraesCS1A03G0538400/TraesCS1A03G0538700/TraesCS1A03G0569000/TraesCS1A03G0592000/TraesCS1A03G0674500/TraesCS1A03G0685600/TraesCS1A03G0717800/TraesCS1A03G0718100/TraesCS1A03G0743700/TraesCS1A03G0772300/TraesCS1A03G0848900/TraesCS1A03G0873800/TraesCS1A03G0892100/TraesCS1A03G1040400/TraesCS2A03G0179800…	204	GO:0009738
flower development	TraesCS1A03G0367900/TraesCS1A03G0577500/TraesCS1A03G0889400/TraesCS1A03G1085100/TraesCS2A03G0046100/TraesCS2A03G0257400/TraesCS2A03G0458300/TraesCS2A03G0495100/TraesCS2A03G0573700/TraesCS2A03G0706900/TraesCS2A03G0751900/TraesCS2A03G0925600/TraesCS2A03G1051100/TraesCS2A03G1240400/TraesCS2A03G1240700/TraesCS2A03G1345300/TraesCS2A03G1348500/TraesCS3A03G0026700/TraesCS3A03G0040200/TraesCS3A03G0020200…	197	GO:0009908
methylation	TraesCS1A03G0033900/TraesCS1A03G0068800/TraesCS1A03G0072200/TraesCS1A03G0072600/TraesCS1A03G0413900/TraesCS1A03G0809600/TraesCS1A03G0829500/TraesCS1A03G0829600/TraesCS1A03G0829800/TraesCS1A03G0830000/TraesCS1A03G0820700/TraesCS1A03G0997800/TraesCS2A03G0018300/TraesCS2A03G0043400/TraesCS2A03G0086600/TraesCS2A03G0091300/TraesCS2A03G0892400/TraesCS2A03G1123700/TraesCS2A03G1164800/TraesCS2A03G1255400…	193	GO:0032259
hydrogen peroxide catabolic process	TraesCS1A03G0190400/TraesCS1A03G0451300/TraesCS1A03G0535100/TraesCS1A03G0757000/TraesCS1A03G0757100/TraesCS1A03G0790200/TraesCS1A03G0845000/TraesCS1A03G0871400/TraesCS2A03G0138900/TraesCS2A03G0224000/TraesCS2A03G0223100/TraesCS2A03G0219600/TraesCS2A03G0270600/TraesCS2A03G0296100/TraesCS2A03G0303700/TraesCS2A03G0304200/TraesCS2A03G0304300/TraesCS2A03G0306300/TraesCS2A03G0760700/TraesCS2A03G1098800…	188	GO:0042744
cellular response to water deprivation	TraesCS1A03G0172800/TraesCS1A03G0173200/TraesCS1A03G0173700/TraesCS1A03G0919500/TraesCS2A03G0464100/TraesCS2A03G0894400/TraesCS2A03G1105800/TraesCS2A03G1105900/TraesCS2A03G1108300/TraesCS2A03G1112200/TraesCS2A03G1130600/TraesCS2A03G1165500/TraesCS2A03G1323100/TraesCS2A03G1323900/TraesCS3A03G0021100/TraesCS3A03G0040800/TraesCS3A03G0041100/TraesCS3A03G0042400/TraesCS3A03G0404500/TraesCS3A03G0405500…	188	GO:0042631
DNA repair	TraesCS1A03G0073300/TraesCS1A03G0093500/TraesCS1A03G0142100/TraesCS1A03G0206300/TraesCS1A03G0297300/TraesCS1A03G0317700/TraesCS1A03G0463800/TraesCS1A03G0516800/TraesCS1A03G0725300/TraesCS1A03G0872300/TraesCS2A03G0046000/TraesCS2A03G0290200/TraesCS2A03G0378100/TraesCS2A03G0447800/TraesCS2A03G0492100/TraesCS2A03G0568200/TraesCS2A03G0587100/TraesCS2A03G0751900/TraesCS2A03G1197900/TraesCS2A03G1220500…	177	GO:0006281
ethylene-activated signaling pathway	TraesCS1A03G0525100/TraesCS1A03G0574000/TraesCS1A03G0577000/TraesCS1A03G0592000/TraesCS1A03G0687800/TraesCS1A03G0720300/TraesCS1A03G0718100/TraesCS1A03G0899400/TraesCS1A03G0953400/TraesCS2A03G0079100/TraesCS2A03G0079200/TraesCS2A03G0082700/TraesCS2A03G0225600/TraesCS2A03G0722900/TraesCS2A03G0948400/TraesCS2A03G1176800/TraesCS2A03G1196500/TraesCS2A03G1212600/TraesCS2A03G1251300/TraesCS2A03G1293000…	170	GO:0009873
RNA modification	TraesCS1A03G0439400/TraesCS1A03G0539400/TraesCS1A03G0541400/TraesCS1A03G0705800/TraesCS1A03G0797300/TraesCS1A03G0851300/TraesCS1A03G0863500/TraesCS1A03G0873000/TraesCS1A03G1039100/TraesCS1A03G1052600/TraesCS2A03G0238800/TraesCS2A03G0269400/TraesCS2A03G0280400/TraesCS2A03G0324100/TraesCS2A03G0409400/TraesCS2A03G0763500/TraesCS2A03G0771100/TraesCS2A03G0970000/TraesCS2A03G1118100/TraesCS2A03G1273600…	166	GO:0009451
cell surface receptor signaling pathway	TraesCS1A03G0011100/TraesCS1A03G0014400/TraesCS1A03G0029900/TraesCS1A03G0039300/TraesCS1A03G0040900/TraesCS1A03G0083200/TraesCS1A03G0175200/TraesCS2A03G0089400/TraesCS2A03G0139200/TraesCS2A03G0139300/TraesCS2A03G0142000/TraesCS2A03G0189900/TraesCS2A03G1050800/TraesCS2A03G1050900/TraesCS2A03G1181900/TraesCS2A03G1186000/TraesCS2A03G1311400/TraesCS3A03G0016000/TraesCS3A03G1024500/TraesCS3A03G1236600…	166	GO:0007166
response to wounding	TraesCS1A03G0046600/TraesCS1A03G0061600/TraesCS1A03G0070900/TraesCS1A03G0056700/TraesCS1A03G0057300/TraesCS1A03G0064900/TraesCS1A03G0098700/TraesCS1A03G0098800/TraesCS1A03G0098900/TraesCS1A03G0387100/TraesCS1A03G0409800/TraesCS1A03G0687500/TraesCS1A03G0700800/TraesCS1A03G0720200/TraesCS1A03G0862600/TraesCS1A03G0953400/TraesCS1A03G0975800/TraesCS2A03G0181100/TraesCS2A03G0769900/TraesCS2A03G0835700…	164	GO:0009611
oxidation-reduction process	TraesCS1A03G0049100/TraesCS1A03G0163300/TraesCS1A03G0488900/TraesCS1A03G0529000/TraesCS1A03G0606500/TraesCS1A03G0712300/TraesCS1A03G0712400/TraesCS1A03G0728700/TraesCS1A03G0718100/TraesCS1A03G0808700/TraesCS1A03G0897200/TraesCS1A03G1053400/TraesCS2A03G0018100/TraesCS2A03G0018200/TraesCS2A03G0029200/TraesCS2A03G0100400/TraesCS2A03G0100600/TraesCS2A03G0100700/TraesCS2A03G0100900/TraesCS2A03G0204200…	163	GO:0055114
unidimensional cell growth	TraesCS1A03G0029900/TraesCS1A03G0039300/TraesCS1A03G0040900/TraesCS1A03G0256600/TraesCS1A03G0497900/TraesCS1A03G0712500/TraesCS1A03G1066900/TraesCS2A03G0089400/TraesCS2A03G0139200/TraesCS2A03G0139300/TraesCS2A03G0142000/TraesCS2A03G0189900/TraesCS2A03G0609700/TraesCS2A03G0642400/TraesCS2A03G1090600/TraesCS2A03G1180500/TraesCS2A03G1181900/TraesCS2A03G1311400/TraesCS3A03G0021500/TraesCS3A03G0016000…	161	GO:0009826
regulation of growth	TraesCS1A03G0259800/TraesCS1A03G0483200/TraesCS1A03G0503000/TraesCS1A03G0608100/TraesCS1A03G0610600/TraesCS2A03G0046100/TraesCS2A03G0332200/TraesCS2A03G0333400/TraesCS2A03G0799000/TraesCS2A03G0978700/TraesCS2A03G1164100/TraesCS2A03G1154300/TraesCS2A03G1196700/TraesCS2A03G1323200/TraesCS2A03G1324000/TraesCS3A03G0282600/TraesCS3A03G0664400/TraesCS3A03G0695500/TraesCS3A03G0699600/TraesCS3A03G0978900…	158	GO:0040008
recognition of pollen	TraesCS1A03G0036200/TraesCS1A03G0623100/TraesCS1A03G0872100/TraesCS2A03G0063200/TraesCS2A03G0096000/TraesCS2A03G0264000/TraesCS2A03G0450200/TraesCS2A03G0452200/TraesCS2A03G0446900/TraesCS2A03G0745400/TraesCS2A03G0746200/TraesCS2A03G0748200/TraesCS2A03G1132800/TraesCS2A03G1135200/TraesCS2A03G1233400/TraesCS2A03G1217600/TraesCS2A03G1242900/TraesCS2A03G1236400/TraesCS2A03G1234000/TraesCS3A03G0162700…	155	GO:0048544
response to light stimulus	TraesCS1A03G0032500/TraesCS1A03G0043500/TraesCS1A03G0097100/TraesCS1A03G0367900/TraesCS1A03G0720200/TraesCS1A03G0827800/TraesCS1A03G0874000/TraesCS1A03G0988100/TraesCS1A03G1009900/TraesCS1A03G1066900/TraesCS2A03G0068300/TraesCS2A03G0236300/TraesCS2A03G0433700/TraesCS2A03G0611400/TraesCS2A03G0852800/TraesCS2A03G1180500/TraesCS3A03G0040200/TraesCS3A03G0090400/TraesCS3A03G0695200/TraesCS3A03G0732000…	154	GO:0009416
proteolysis	TraesCS1A03G0244400/TraesCS1A03G0687500/TraesCS1A03G1083600/TraesCS1A03G1079600/TraesCS2A03G0132500/TraesCS2A03G0224800/TraesCS2A03G0407400/TraesCS2A03G1055000/TraesCS2A03G1286600/TraesCS3A03G0094200/TraesCS3A03G0111700/TraesCS3A03G0417100/TraesCS3A03G0579200/TraesCS3A03G0718900/TraesCS3A03G0946300/TraesCS3A03G1097600/TraesCS3A03G1099100/TraesCS3A03G1220200/TraesCS4A03G0865200/TraesCS4A03G0968000…	154	GO:0006508
root development	TraesCS1A03G0363000/TraesCS1A03G0394700/TraesCS1A03G0497900/TraesCS1A03G0575600/TraesCS1A03G0592000/TraesCS2A03G0057000/TraesCS2A03G0084900/TraesCS2A03G0522600/TraesCS2A03G0616800/TraesCS2A03G0803000/TraesCS2A03G0875100/TraesCS2A03G1176800/TraesCS2A03G1303000/TraesCS3A03G0097300/TraesCS3A03G0417100/TraesCS3A03G0513700/TraesCS3A03G0886200/TraesCS3A03G0920100/TraesCS3A03G0929100/TraesCS3A03G1023300…	151	GO:0048364
intracellular protein transport	TraesCS1A03G0031500/TraesCS1A03G0054100/TraesCS1A03G0524200/TraesCS1A03G0588100/TraesCS1A03G0696400/TraesCS1A03G0728500/TraesCS1A03G0720100/TraesCS1A03G0720300/TraesCS1A03G0889200/TraesCS1A03G0874700/TraesCS1A03G0917900/TraesCS1A03G0983500/TraesCS2A03G0023700/TraesCS2A03G0026200/TraesCS2A03G0139400/TraesCS2A03G0316400/TraesCS2A03G0736100/TraesCS2A03G1295700/TraesCS3A03G0026200/TraesCS3A03G0118800…	150	GO:0006886
positive regulation of transcription by RNA polymerase II	TraesCS1A03G0032400/TraesCS1A03G0056400/TraesCS1A03G0533300/TraesCS1A03G0634500/TraesCS2A03G0063100/TraesCS2A03G0338900/TraesCS2A03G0706900/TraesCS2A03G1083900/TraesCS3A03G0306900/TraesCS3A03G1006400/TraesCS3A03G1007300/TraesCS3A03G1240200/TraesCS3A03G1240500/TraesCS3A03G1247900/TraesCS3A03G1269400/TraesCS4A03G0004000/TraesCS4A03G0032600/TraesCS4A03G0116200/TraesCS4A03G0507800/TraesCS4A03G0560900…	143	GO:0045944
response to salicylic acid	TraesCS1A03G0029900/TraesCS1A03G0032500/TraesCS1A03G0034000/TraesCS1A03G0039300/TraesCS1A03G0040900/TraesCS1A03G0324400/TraesCS1A03G0409400/TraesCS1A03G1051300/TraesCS2A03G0082700/TraesCS2A03G0089400/TraesCS2A03G0122400/TraesCS2A03G0139200/TraesCS2A03G0139300/TraesCS2A03G0189900/TraesCS2A03G0512800/TraesCS2A03G0812400/TraesCS2A03G0835700/TraesCS2A03G1127900/TraesCS2A03G1168200/TraesCS2A03G1181900…	143	GO:0009751
response to chitin	TraesCS1A03G0067500/TraesCS1A03G0095700/TraesCS1A03G0146100/TraesCS1A03G0416900/TraesCS1A03G0574000/TraesCS1A03G0585500/TraesCS1A03G0631600/TraesCS1A03G0720200/TraesCS1A03G0747900/TraesCS1A03G0848900/TraesCS1A03G0899400/TraesCS2A03G0082700/TraesCS2A03G0403500/TraesCS2A03G0742500/TraesCS2A03G0952700/TraesCS2A03G1116100/TraesCS2A03G1236600/TraesCS3A03G0103200/TraesCS3A03G0846400/TraesCS4A03G0208200…	140	GO:0010200
response to cadmium ion	TraesCS1A03G0090900/TraesCS1A03G0163300/TraesCS1A03G0249000/TraesCS1A03G0268200/TraesCS1A03G0562200/TraesCS1A03G0881600/TraesCS1A03G0888500/TraesCS1A03G1008400/TraesCS2A03G0057000/TraesCS2A03G0781400/TraesCS2A03G0917500/TraesCS2A03G1152000/TraesCS2A03G1188900/TraesCS2A03G1306600/TraesCS2A03G1323100/TraesCS2A03G1323900/TraesCS2A03G1313500/TraesCS3A03G0031100/TraesCS3A03G0041700/TraesCS3A03G0090400…	138	GO:0046686
transmembrane transport	TraesCS1A03G0119600/TraesCS1A03G0548900/TraesCS1A03G0989800/TraesCS1A03G1008900/TraesCS1A03G1032800/TraesCS1A03G1031800/TraesCS2A03G0057000/TraesCS2A03G0092600/TraesCS2A03G0109900/TraesCS2A03G0736200/TraesCS2A03G0803000/TraesCS2A03G0913900/TraesCS2A03G0915800/TraesCS2A03G1278600/TraesCS2A03G1303000/TraesCS2A03G1332800/TraesCS3A03G0691300/TraesCS3A03G0712800/TraesCS4A03G0011900/TraesCS4A03G0098100…	137	GO:0055085
response to auxin	TraesCS1A03G0070500/TraesCS1A03G0592800/TraesCS2A03G0063100/TraesCS2A03G0071700/TraesCS2A03G0072700/TraesCS2A03G0124600/TraesCS2A03G0124700/TraesCS2A03G0124800/TraesCS2A03G0236300/TraesCS2A03G0338900/TraesCS2A03G0608600/TraesCS2A03G0803000/TraesCS2A03G0835700/TraesCS2A03G0987800/TraesCS2A03G1177400/TraesCS2A03G1288700/TraesCS2A03G1348900/TraesCS2A03G1349600/TraesCS2A03G1349700/TraesCS3A03G0234200…	137	GO:0009733
pollen development	TraesCS1A03G0764700/TraesCS1A03G0862600/TraesCS1A03G0879700/TraesCS1A03G0947100/TraesCS2A03G0013900/TraesCS2A03G0057000/TraesCS2A03G0245800/TraesCS2A03G0339500/TraesCS2A03G0729900/TraesCS2A03G0758200/TraesCS2A03G0820900/TraesCS2A03G0835700/TraesCS2A03G1016500/TraesCS2A03G1182500/TraesCS2A03G1324400/TraesCS3A03G0426100/TraesCS3A03G0727800/TraesCS3A03G0964400/TraesCS3A03G1153800/TraesCS3A03G1175500…	132	GO:0009555
response to heat	TraesCS1A03G0126000/TraesCS1A03G0554100/TraesCS1A03G0580100/TraesCS1A03G0623200/TraesCS1A03G0623300/TraesCS1A03G0719600/TraesCS1A03G0720200/TraesCS1A03G1051700/TraesCS2A03G0708800/TraesCS2A03G1019500/TraesCS2A03G1019600/TraesCS3A03G0230900/TraesCS3A03G0246200/TraesCS3A03G1066700/TraesCS3A03G1181900/TraesCS4A03G0042200/TraesCS4A03G0042300/TraesCS4A03G0059800/TraesCS4A03G0101100/TraesCS4A03G0131800…	129	GO:0009408
defense response signaling pathway, resistance gene-dependent	TraesCS1A03G0012700/TraesCS1A03G0065600/TraesCS2A03G0138700/TraesCS2A03G0138800/TraesCS2A03G0817000/TraesCS2A03G0817200/TraesCS2A03G0817300/TraesCS2A03G0881400/TraesCS2A03G0881100/TraesCS3A03G0417100/TraesCS3A03G1189300/TraesCS4A03G0026300/TraesCS4A03G0167800/TraesCS4A03G0785900/TraesCS4A03G0866200/TraesCS5A03G0486900/TraesCS5A03G0744000/TraesCS5A03G0748800/TraesCS5A03G0790400/TraesCS5A03G0826500…	127	GO:0009870
RNA splicing	TraesCS1A03G0501200/TraesCS1A03G0723100/TraesCS1A03G0724700/TraesCS1A03G0730700/TraesCS1A03G0863800/TraesCS2A03G0479400/TraesCS2A03G0522600/TraesCS2A03G0557700/TraesCS2A03G0941800/TraesCS2A03G1310800/TraesCS3A03G0073200/TraesCS3A03G0350700/TraesCS3A03G0475400/TraesCS3A03G0496900/TraesCS3A03G0546300/TraesCS3A03G0581400/TraesCS3A03G0897700/TraesCS3A03G1166800/TraesCS3A03G1239800/TraesCS4A03G0195300…	125	GO:0008380
leaf senescence	TraesCS1A03G0070500/TraesCS1A03G0363000/TraesCS1A03G0585000/TraesCS1A03G0702200/TraesCS1A03G0953400/TraesCS2A03G0082700/TraesCS2A03G0067000/TraesCS2A03G0105500/TraesCS2A03G0105200/TraesCS2A03G0105800/TraesCS2A03G0105700/TraesCS2A03G0105600/TraesCS2A03G1007500/TraesCS2A03G1222400/TraesCS2A03G1309000/TraesCS3A03G0193700/TraesCS3A03G0234200/TraesCS3A03G0238100/TraesCS3A03G0929100/TraesCS3A03G0986700…	125	GO:0010150
mRNA splicing, via spliceosome	TraesCS1A03G0232100/TraesCS1A03G0475600/TraesCS1A03G0818500/TraesCS1A03G0897100/TraesCS1A03G1081300/TraesCS2A03G0290900/TraesCS2A03G0364800/TraesCS2A03G0522600/TraesCS2A03G0502100/TraesCS2A03G0708900/TraesCS2A03G1225400/TraesCS2A03G1286700/TraesCS2A03G1284700/TraesCS3A03G0417100/TraesCS3A03G0635600/TraesCS3A03G0661500/TraesCS3A03G1035200/TraesCS3A03G1024300/TraesCS4A03G0350600/TraesCS4A03G0617200…	124	GO:0000398
negative regulation of transcription, DNA-templated	TraesCS1A03G0043500/TraesCS1A03G0141400/TraesCS1A03G0167300/TraesCS1A03G0835800/TraesCS1A03G1043700/TraesCS2A03G0082700/TraesCS2A03G0134600/TraesCS2A03G0200300/TraesCS2A03G0217900/TraesCS2A03G0218300/TraesCS2A03G0257400/TraesCS2A03G0399800/TraesCS2A03G0403500/TraesCS2A03G0576800/TraesCS2A03G0782900/TraesCS2A03G0955500/TraesCS2A03G1166200/TraesCS3A03G0162900/TraesCS3A03G0234200/TraesCS3A03G0238100…	119	GO:0045892
response to ethylene	TraesCS1A03G0525100/TraesCS1A03G0585000/TraesCS1A03G0592000/TraesCS1A03G0718100/TraesCS2A03G0024200/TraesCS2A03G0067000/TraesCS2A03G0105500/TraesCS2A03G0105200/TraesCS2A03G0105800/TraesCS2A03G0105700/TraesCS2A03G0105600/TraesCS2A03G0225600/TraesCS2A03G1007500/TraesCS2A03G1234200/TraesCS2A03G1300100/TraesCS3A03G0069900/TraesCS3A03G0234200/TraesCS3A03G0238100/TraesCS3A03G0929100/TraesCS4A03G0008600…	118	GO:0009723
regulation of gene expression	TraesCS1A03G0223100/TraesCS1A03G0571900/TraesCS1A03G0674500/TraesCS1A03G0698900/TraesCS1A03G0782000/TraesCS1A03G0983400/TraesCS1A03G1014400/TraesCS1A03G1027100/TraesCS3A03G0658900/TraesCS3A03G1207500/TraesCS4A03G0021400/TraesCS4A03G0095400/TraesCS4A03G0828500/TraesCS4A03G1082000/TraesCS5A03G0092400/TraesCS5A03G0132800/TraesCS5A03G0152400/TraesCS5A03G0468300/TraesCS5A03G0600400/TraesCS5A03G0600300…	118	GO:0010468
signal transduction	TraesCS1A03G0053800/TraesCS1A03G0819200/TraesCS1A03G0827000/TraesCS1A03G0913900/TraesCS1A03G0998400/TraesCS2A03G0220000/TraesCS2A03G0269200/TraesCS2A03G0422000/TraesCS2A03G0450400/TraesCS2A03G1056000/TraesCS2A03G1056600/TraesCS2A03G1052600/TraesCS2A03G1195400/TraesCS2A03G1289700/TraesCS3A03G0200600/TraesCS3A03G0312800/TraesCS3A03G0430700/TraesCS3A03G0594500/TraesCS3A03G0670300/TraesCS3A03G0736500…	117	GO:0007165
cellular response to hypoxia	TraesCS1A03G0374600/TraesCS1A03G0459500/TraesCS1A03G0720200/TraesCS1A03G0847500/TraesCS1A03G0953400/TraesCS1A03G1062200/TraesCS2A03G0082700/TraesCS2A03G0157100/TraesCS2A03G0138700/TraesCS2A03G0138800/TraesCS2A03G0261000/TraesCS2A03G0847500/TraesCS2A03G1074200/TraesCS2A03G1074400/TraesCS2A03G1301200/TraesCS3A03G0667600/TraesCS3A03G0717700/TraesCS3A03G0720600/TraesCS4A03G0068000/TraesCS4A03G0208200…	116	GO:0071456
cytokinin-activated signaling pathway	TraesCS1A03G0497900/TraesCS1A03G0843500/TraesCS1A03G0967800/TraesCS1A03G1084200/TraesCS1A03G1084300/TraesCS1A03G1084500/TraesCS2A03G0139900/TraesCS2A03G1272900/TraesCS3A03G0298200/TraesCS3A03G0298400/TraesCS3A03G0344100/TraesCS3A03G0696000/TraesCS3A03G1007200/TraesCS4A03G0125600/TraesCS4A03G0686900/TraesCS4A03G0761000/TraesCS4A03G0761200/TraesCS4A03G0761400/TraesCS4A03G0761800/TraesCS4A03G0762900…	115	GO:0009736
chloroplast organization	TraesCS1A03G0244400/TraesCS1A03G0359000/TraesCS1A03G0450000/TraesCS1A03G0452800/TraesCS1A03G0608100/TraesCS1A03G0803800/TraesCS1A03G1006700/TraesCS1A03G1062100/TraesCS2A03G0029500/TraesCS2A03G0057000/TraesCS2A03G0256700/TraesCS2A03G0239500/TraesCS2A03G0825700/TraesCS2A03G0916500/TraesCS2A03G1217200/TraesCS2A03G1324900/TraesCS2A03G1325000/TraesCS3A03G0700700/TraesCS3A03G0837900/TraesCS4A03G0039500…	114	GO:0009658
fatty acid biosynthetic process	TraesCS1A03G0095400/TraesCS1A03G0097100/TraesCS1A03G0897200/TraesCS1A03G1009900/TraesCS1A03G1066900/TraesCS2A03G0086600/TraesCS2A03G0145500/TraesCS2A03G0200500/TraesCS2A03G0349600/TraesCS2A03G0466300/TraesCS2A03G0694900/TraesCS2A03G0823400/TraesCS2A03G1180500/TraesCS2A03G1255400/TraesCS4A03G0012800/TraesCS4A03G0046100/TraesCS4A03G0135500/TraesCS4A03G0496200/TraesCS4A03G0763400/TraesCS4A03G0812900…	114	GO:0006633
flavonoid biosynthetic process	TraesCS1A03G0072500/TraesCS1A03G0248200/TraesCS1A03G0997800/TraesCS1A03G1079100/TraesCS1A03G1079300/TraesCS2A03G0052400/TraesCS2A03G0045500/TraesCS2A03G0045600/TraesCS2A03G0045700/TraesCS2A03G0084500/TraesCS2A03G0369000/TraesCS2A03G0369400/TraesCS2A03G1127300/TraesCS2A03G1127400/TraesCS2A03G1139000/TraesCS2A03G1223400/TraesCS2A03G1316100/TraesCS3A03G0837700/TraesCS3A03G0895200/TraesCS4A03G0226200…	114	GO:0009813
protein catabolic process	TraesCS1A03G0244400/TraesCS1A03G0527300/TraesCS1A03G1000400/TraesCS1A03G1083600/TraesCS2A03G0047100/TraesCS2A03G0132500/TraesCS2A03G0181000/TraesCS2A03G0224800/TraesCS2A03G0407400/TraesCS2A03G1116200/TraesCS2A03G1286600/TraesCS3A03G0094200/TraesCS3A03G0111700/TraesCS3A03G0718900/TraesCS3A03G0946300/TraesCS3A03G1097600/TraesCS3A03G1099100/TraesCS3A03G1220200/TraesCS4A03G0235700/TraesCS4A03G0968000…	113	GO:0030163
cell cycle	TraesCS1A03G0174100/TraesCS1A03G0463800/TraesCS1A03G0562200/TraesCS1A03G0634500/TraesCS1A03G0681700/TraesCS1A03G0818800/TraesCS1A03G0887800/TraesCS1A03G0936500/TraesCS1A03G0967800/TraesCS2A03G0063100/TraesCS2A03G0521900/TraesCS2A03G0608600/TraesCS2A03G0700700/TraesCS2A03G0777400/TraesCS2A03G0944900/TraesCS2A03G1122000/TraesCS2A03G1161800/TraesCS2A03G1214700/TraesCS3A03G0015300/TraesCS3A03G0112700…	113	GO:0007049
protein folding	TraesCS1A03G0020600/TraesCS1A03G0486200/TraesCS1A03G0545800/TraesCS1A03G0562100/TraesCS1A03G0881600/TraesCS1A03G0914100/TraesCS2A03G0066600/TraesCS2A03G0754200/TraesCS2A03G0763400/TraesCS2A03G0775000/TraesCS3A03G0246200/TraesCS3A03G0349400/TraesCS3A03G0738200/TraesCS3A03G0946300/TraesCS3A03G1181900/TraesCS4A03G0087800/TraesCS4A03G1013000/TraesCS5A03G0074100/TraesCS5A03G0217400/TraesCS5A03G0277200…	108	GO:0006457
protein glycosylation	TraesCS1A03G0547400/TraesCS1A03G0717700/TraesCS1A03G0757500/TraesCS2A03G0421300/TraesCS2A03G0983900/TraesCS2A03G1079100/TraesCS2A03G1114300/TraesCS2A03G1282700/TraesCS3A03G0041900/TraesCS3A03G0042100/TraesCS3A03G0042200/TraesCS3A03G0042300/TraesCS3A03G0090400/TraesCS3A03G0207500/TraesCS3A03G0879800/TraesCS3A03G0997800/TraesCS3A03G1023700/TraesCS3A03G1024100/TraesCS4A03G0428400/TraesCS4A03G0435800…	106	GO:0006486
plant-type cell wall organization	TraesCS1A03G0050200/TraesCS1A03G0660000/TraesCS1A03G0863600/TraesCS1A03G0873100/TraesCS1A03G0995200/TraesCS1A03G0995100/TraesCS2A03G0364600/TraesCS2A03G0364700/TraesCS2A03G1026600/TraesCS3A03G0043800/TraesCS3A03G0047900/TraesCS3A03G0074800/TraesCS3A03G0770900/TraesCS3A03G1173100/TraesCS3A03G1238700/TraesCS4A03G0061500/TraesCS4A03G0065200/TraesCS4A03G0065400/TraesCS4A03G0113900/TraesCS4A03G0136300…	103	GO:0009664
glutathione metabolic process	TraesCS1A03G0034000/TraesCS1A03G0040400/TraesCS1A03G0040000/TraesCS1A03G0501600/TraesCS1A03G0501800/TraesCS1A03G0502800/TraesCS1A03G0502900/TraesCS1A03G0503000/TraesCS1A03G0542800/TraesCS2A03G0085500/TraesCS2A03G1323100/TraesCS2A03G1323200/TraesCS2A03G1323500/TraesCS2A03G1323900/TraesCS2A03G1324000/TraesCS3A03G0043100/TraesCS3A03G0664700/TraesCS3A03G0745100/TraesCS3A03G0745700/TraesCS3A03G1066700…	103	GO:0006749
intracellular signal transduction	TraesCS1A03G0059700/TraesCS1A03G0195700/TraesCS1A03G0569000/TraesCS1A03G0685600/TraesCS1A03G0731100/TraesCS1A03G0763400/TraesCS1A03G0819200/TraesCS1A03G0983400/TraesCS1A03G1014400/TraesCS1A03G1027100/TraesCS2A03G0200700/TraesCS2A03G0438000/TraesCS2A03G0558800/TraesCS2A03G0595200/TraesCS2A03G1152100/TraesCS2A03G1348400/TraesCS3A03G0513700/TraesCS4A03G0224500/TraesCS4A03G0224700/TraesCS4A03G0266600…	102	GO:0035556
innate immune response	TraesCS1A03G0070800/TraesCS2A03G0159000/TraesCS2A03G0242200/TraesCS2A03G0280400/TraesCS2A03G1004700/TraesCS3A03G0417100/TraesCS3A03G0426000/TraesCS3A03G0699500/TraesCS3A03G0939300/TraesCS3A03G1254100/TraesCS4A03G0180100/TraesCS4A03G0682700/TraesCS4A03G0780800/TraesCS5A03G0031900/TraesCS5A03G0608500/TraesCS5A03G0748800/TraesCS5A03G0782800/TraesCS5A03G0797400/TraesCS5A03G1130400/TraesCS5A03G1171800…	102	GO:0045087
regulation of transcription by RNA polymerase II	TraesCS1A03G0177700/TraesCS1A03G0571800/TraesCS2A03G0495700/TraesCS2A03G1056000/TraesCS2A03G1056600/TraesCS3A03G0040200/TraesCS3A03G0231900/TraesCS3A03G1029100/TraesCS4A03G0041400/TraesCS4A03G0536600/TraesCS4A03G0661400/TraesCS4A03G0660800/TraesCS4A03G0743300/TraesCS4A03G0937700/TraesCS5A03G0017500/TraesCS5A03G0034200/TraesCS5A03G0411600/TraesCS5A03G0469600/TraesCS5A03G0540300/TraesCS5A03G0645600…	101	GO:0006357
hormone-mediated signaling pathway	TraesCS1A03G0014600/TraesCS1A03G0018600/TraesCS1A03G0018800/TraesCS1A03G0018900/TraesCS1A03G0654900/TraesCS1A03G0954800/TraesCS2A03G0022500/TraesCS3A03G0128000/TraesCS3A03G0417100/TraesCS4A03G0117000/TraesCS4A03G0771600/TraesCS4A03G1014700/TraesCS4A03G0970600/TraesCS5A03G0170300/TraesCS5A03G1007800/TraesCS6A03G0067700/TraesCS6A03G0120100/TraesCS6A03G1000300/TraesCS7A03G0027500/TraesCS7A03G0011400…	101	GO:0009755

## Sheet: Supplementary Table 3
Supplementary Table 3. The drought tolerance yield coefficient of 159 accessions in GWAS.
Vcf id	Sample names	Drought tolerance coefficient of yield (DTCGY)
G453	xinong3517	1
WXB184	TianHe3Hao	1
WXB467	ChiXiaoMai	1
WXB191	XiNong529	1
ZY83	MoZhuGK2064	1
s295	jin50LP-82	0.999678
WXB338	JinHe9123	0.998103
s8762-1	8762	0.995889
WXB291	LuoHan7Hao	0.995608
JM20	JiMai20	0.994893
G5-1	Gao5	0.994664
C1-3	HeSheng2	0.994119
G455	xinong9718	0.993995
ji200040919	ji200040919	0.990914
WXB129	HanSheng923	0.988788
17P049	17P049	0.985543
WXB149	KeNong2009	0.983321
312	YunHan20410	0.980567
WXB451	XiNong2208	0.976018
WXB186	TianMin298	0.975574
WXB9	HuangXianDaLiBanMang	0.970293
WXB157	LuoMai23	0.969201
WXB58	ShanNong21	0.96794
WXB168	PingAn9Hao	0.96753
ZY-64	Shi4185	0.966857
WXB74	TaiShan4Hao	0.965543
WXB331	HengGuan35	0.965472
SRR10766504	Wangshuibai	0.962426
WXB2	BiMa1Hao	0.959629
WXB445	XiNong558	0.959116
WXB49	LuTeng1Hao	0.955691
WXB314	Han6172	0.954478
WXB559	Triumph/ShengLiMai	0.954119
WXB313	YaoMai16	0.951844
long6878-1	Chang6878	0.950027
DJ2	BaiNong207	0.948103
WXB293	JinMai31	0.940577
WXB348	ShiXin633	0.940492
Y29-1	Yuan29	0.940203
ZY183	SHXMaZhaMai	0.937394
WXB247	ZhengNong17Hao	0.936108
WXB329	Heng6632	0.93554
N981-1	NongDa981	0.934648
G407	zhongmai349	0.932297
WXB5	ChangLe5Hao	0.932207
jimai44	JiMai44	0.931729
C4-2	JiMai22	0.930907
WXB259	ZhongYu6Hao	0.927509
WXB361	BeiJing0045	0.925074
WXB185	TianMin198	0.922636
WXB268	ZhouMai16	0.920715
C2-1	4332	0.919406
WXB76	TaiShan21	0.9166
G70	tainong2419	0.913504
WXB89	YueJin5Hao	0.913331
s209	ChangZhi6406	0.91234
WXB352	ShiJiaZhuang9Hao	0.911773
WXB203	XinMai208	0.909699
SRR10766626	Yanzhan 4110	0.908995
G231	yunong201	0.907732
WXB99	ZiMai12	0.9067
249	ZhengPinMai8Hao	0.905894
WXB274	ZhouMai23	0.905517
WXB171	QiMai2Hao	0.903103
WXB394	NongDa413	0.89146
WXB65	ShanNongYouMai3Hao	0.89125
WXB562	WenMai6Hao	0.889614
WXB343	ShiMai15	0.889492
WXB437	WuNong6	0.882019
269	ZhouMai17	0.878926
WXB279	ZhouMai30	0.876286
WXB114	BoNong6Hao	0.873149
WXB120	DeHongFuMai8Hao	0.866875
s238	JPNongLin10	0.865328
WXB447	XiNong889	0.863733
WXB170	PuXing5Hao	0.85888
WXB47	LuMai22	0.857353
s253	XJHongDongMai	0.85704
ZY184	SHXXiaoSanYueH	0.856554
WXB409	ZhongMai875	0.856289
ZY-10	pingyuan50	0.851641
s186	SDBaiBianSui	0.843808
WXB123	FengWu981	0.83616
s245	BianBaChunMai6	0.835201
WXB165	PingAn7Hao	0.826423
WXB21	JiNan13	0.826
WXB78	TaiShan23	0.824081
WXB284	LanKao926	0.814198
s213	BiMa4	0.814089
WXB188	WeiLai0818	0.810314
Ak58Simu	Ak58	0.804067
WXB297	LinFen5064	0.795225
CH7034	CH7034	0.791624
WXB444	XiNong556	0.787109
WXB75	TaiShan5Hao	0.784329
WXB395	NongDa3432	0.779794
WXB324	Heng4399	0.776311
161	LuoMai8Hao	0.774117
WXB87	YouBaoMai	0.773452
ZY-67	NongDa3338	0.771709
ZY140	NongDa5181	0.771337
WXB144	JunDa129	0.763652
WXB248	ZhengNong46	0.763153
s249	SCKangDing1	0.759431
s188	SDLaoLaiXia	0.750379
s3753-1	NongDa3753	0.740602
WXB166	PingAn8Hao	0.735778
s3097-1	NongDa3097	0.735093
WXB22	JiNan16	0.734447
WXB309	YunHan805	0.728925
WXB55	ShanNong12	0.727478
s227	ShiJiaZhuang54	0.724744
WXB30	LiangXing77	0.715523
SY95-71	SY95-71	0.715054
SRR10766520	Beijing 8	0.700926
WXB410	ZhongYou206	0.700566
WXB459	XiNong9872	0.698546
s252	XJHongChunMai	0.698233
WXB14	JiMai23	0.690114
WXB387	NongDa179	0.685288
s6554-2	jingdong6	0.682922
WXB424	QinNong142	0.682562
WXB273	ZhouMai22	0.680045
ZY181	SXBaiHuoMai	0.662803
WXB277	ZhouMai26	0.660249
ZY135	ZhouMai18	0.658889
s185	SDXiShanBianSui	0.651664
WXB44	LuMai15	0.649737
WXB28	LaiYang4671	0.648172
keyi5214-1	KeYi5214	0.642312
WXB281	ZhouMai32	0.635341
431	Shan627	0.632565
ZY-5	MoZhuGK1772	0.62797
WXB102	YanNong23	0.624775
s211	EnMai4	0.614574
L46	lumai3	0.610111
WXB226	YuJiao6Hao	0.605822
s228	XZZangDong4	0.596928
WXB465	GaoJiaSuo	0.596582
446	XiNong822	0.590551
jimai229	JiMai229	0.587956
ZY103	GSDaBaiMai	0.586656
SRR10766558	Jinan 17	0.586251
WXB256	ZhongYu1123	0.570556
WXB10	JiMai19	0.570392
s241	QHGeJiaXiang	0.566746
ZY87	JiangZi1407	0.564875
WXB101	YanNong21	0.556462
ZY92	DuiLongDeQing1284	0.531831
ZY-12	Apache	0.513696
ZY90	GongBuJiangDa1525	0.509726
ZY113	QHLiuYueHuang	0.492867
L277	ZhengMai1817	0.473199
s48	LuMai23	0.449884
s212	Lovrin 10	0.436418
s223	zhengyin4	0.42653
s187	SDDaLiBanMang	0.420614
C3-2	TAA10	0.402198
s242	SCBenDiHuangHua	0.196815

## Sheet: Supplementary Table 4
Supplementary Table 4. The Survival Rate of 129 accessions in GWAS.
Vcf id	Sample names	Survival rate (SR %)
s242	Bendihuanghuamai	0
s188	Laolaixia	0
L46	Lumai3hao	0
SRR10766504	Wangshuibai	0
s250	Yizhimai	0
s257	Chayusuisui5	0.694444
ZY-67	Nongda3338	4.36508
ZY90	AS1525	5.25794
ZY-28	Longzisuisui23	6.94444
s255	Chayusuisui2	7.63889
ZY83	AS2064	10.4167
ZY113	Liuyuehuang	13.4921
s254	Hongjinbaoyin	14.7817
WXB9	Huangxiandalibanmang	14.7817
ZY92	AS1284	17.1627
ZY-10	Pingyuan50	17.3611
s48	Lumai23	18.5516
ZY84	AS2050	19.7421
S159	Longzizheda28	24.3056
WXB202	Xinmai20	25.1984
ZY-24	Langxiansuisui17	25.3968
s241	Gejiaxiang	26.0913
s219	Nanda2419	27.877
ZY-20	Jiachasuisui33	28.1746
ZY183	Mazhamai	30.0595
WXB166	Pingan8hao	30.8532
ZY184	Xiaosanyuehuang	30.9524
WXB281	Zhoumai32	30.9524
ZY108	Shanmai	31.746
WXB149	Kenong2009	32.7381
N981-1	Nongda981	33.3333
WXB279	Zhoumai30	33.5317
WXB49	Luteng1hao	34.127
keyi5214-1	Keyi5214	34.9206
WXB188	Weilai188	35.4167
s217	Zhengmai9023	37.7976
G5-1	Gao5	38.4921
WXB55	Shannong12	39.0873
WXB58	Shannong21	39.2857
WXB562	Wenmai6hao	39.3849
s243	Zhahong	39.7817
ZY106	Baidatou	41.2698
WXB445	Xinong558	42.1627
WXB89	Yuejin5hao	42.5595
WXB77	Taishan22	42.8571
WXB271	Zhoumai19	43.6508
WXB459	Xinong9872	43.7489
s187	Dalibanmang	44.3452
WXB247	Zhengnong17	45.6338
s245	Bianbachunmai6	45.8333
s218	Yanzhan1hao	45.9325
s244	Motuoxiaomai	46.9246
954072	954072	47.2211
WXB168	Pingan9hao	47.2222
WXB444	Xinong556	47.5198
s185	Xishanbiansui	47.5198
s212	Lovrin 10	48.2143
C2-1	4332	48.3135
WXB256	Zhongyu1123	48.9087
WXB324	Heng4399	49.2063
ZY-12	Apache	50
s209	Changzhi6406	50
WXB75	Taishan5hao	50.0981
WXB467	Chixiaomai	50.1984
ZY-41	Longzizheda4	50.1984
WXB65	Shannongyoumai4hao	50.2976
WXB158	Luomai24	50.3968
s3097-1	Nongda3097	50.3968
WXB74	Taishan4hao	50.3968
WXB293	Jinmai31	50.4949
WXB44	Luamai15	51.4881
WXB313	Yaomai16	51.5862
WXB102	Yannong23	51.7857
C3-2	TAA10	52.381
WXB309	Yunhan805	52.8759
ZY75	AS1367	53.373
s213	Bima4hao	54.8611
WXB165	Pingan7hao	56.1508
SRR10766520	Beijing8hao	56.25
s210	Sumai3hao	60.6151
s211	Enmai4hao	61.7063
SRR10766558	Jinan17	62.0029
WXB273	Zhoumai22	62.3997
SRR10766556	Ningchun4hao	62.8968
ji200040919	Ji200040919	62.996
WXB265	Zhongyuanmai	64.4841
WXB248	Zhengnong46	64.9802
jimai229	Jimai229	65.9722
s238	Nonglin10hao	67.3611
ZY103	Dabaimai	67.4603
WXB184	Tianhe3hao	67.6587
WXB101	Yannong21	69.4444
WXB114	Bonong6hao	69.7421
ZY135	Zhoumai18	70.7341
WXB203	Xinmai208	70.8333
ZY-5	AS1772	73.1151
WXB259	Zhongyu6hao	73.1151
s3753-1	Nongda3753	73.3135
WXB275	Zhoumai24	73.5119
WXB297	Linfen5064	74.3056
WXB10	Jimai19	75.9921
WXB120	Dehongfumai8hao	76.5873
s237	Aodesa3hao	77.2817
WXB219	Yimai6hao	77.2817
long6878-1	Chang6878	78.0754
DJ-5	Lankao906	78.7698
WXB261	Zhongyu8hao	79.1667
s230	Rikaze8hao	79.4643
WXB123	Fengwu981	80.0595
WXB226	Yujiao6hao	81.0516
WXB47	Lumai22	81.6468
WXB186	Tianmin298	82.1429
WXB30	Liangxing77	82.4405
C5-1	Jing411	82.8373
XX-2	XX329	83.1349
WXB268	Zhoumai16	83.1349
s227	Shijiazhuang54	83.8294
WXB329	Heng6632	84.2262
ZY-64	Shi4185	85.3175
WXB22	Jinan16	87.4008
DJ1	Jinmai47	88.8889
WXB291	Luohan7hao	88.9881
L446	Shannong138	90.2778
s295	JIN50	97.9167
151	Lankao198	43.6508
249	Zhengpinmai8hao	73.6111
312	Yunhan20410	62.2013
s223	Zhengyin4hao	67.0635
s6554-2	Jingdong6hao	65.377

## Sheet: Supplementary Table 5
Supplementary Table 5. Analysis of haplotypes, survival rates, expression levels and methylation status of TaLBD1 in 67 accessions .
Vcf id	Varieties	Survival Rate (%)	TaLBD1 Haplotype	Up-regulated expression fold under drought stress	DNA amplification of (+McrBC/-McrBC) %	DNA methylation status %
WXB49	Luteng1hao	34.127	+TE	7.22458	72.6186	27.3814
L46	Lumai3	0	+TE	0.015989	1.42119	98.5788
S159	Longzizheda28	24.3056	+TE	0.0450301	0.517433	99.4826
s185	Xishanbiansui	47.5198	+TE	0.0658177	1.10699	98.893
s188	Laolaixia	0	+TE	0.141502	6.0905	93.9095
s213	Bima4	54.8611	+TE	0.151213	6.3692	93.6308
s241	Gejiaxiang	26.0913	+TE	0.172418	6.85204	93.148
s242	BendiHuanghuamai	0	+TE	0.205173	4.72426	95.2757
s243	Zhahong	39.7817	+TE	0.330889	15.6412	84.3588
s244	Motuoxiaomai	46.9246	+TE	0.414008	17.5124	82.4876
s245	Bianbachunmai6	45.8333	+TE	0.479812	21.2621	78.7379
WXB265	Zhongyuanmai	64.4841	+TE	0.658888	23.488	76.512
s250	Yizhimai	0	+TE	0.672455	13.2096	86.7904
s254	Hongjinbaoyin	14.7817	+TE	1.04565	40.1768	59.8232
s255	Chayusuisuimai2	7.63889	+TE	1.37752	21.3771	78.6229
s257	Chayusuisuimai5	0.694444	+TE	1.9629	39.164	60.836
ZY-5	AS1772	73.1151	+TE	3.36417	2.06592	97.9341
SRR10766520	Beijing8	56.25	+TE	3.37858	2.3143	97.6857
s3097-1	Nongda3097	50.3968	+TE	14.8666	53.5594	46.4406
WXB202	Xinmai20	25.1984	+TE	3.38087	2.49042	97.5096
WXB256	Zhongyu1123	48.9087	+TE	5.15224	45.1367	54.8633
WXB30	Liangxing77	82.4405	+TE	5.16585	9.55565	90.4444
WXB44	Lumai15	51.4881	+TE	5.18167	12.4347	87.5653
ZY75	AS1367	53.373	+TE	16.4034	56.4115	43.5885
WXB467	Chixiaomai	50.1984	+TE	5.8532	12.9238	87.0762
WXB9	Huangxiandalibanmang	14.7817	+TE	0.813542	30.1061	69.8939
ZY-10	Pingyuan50	17.3611	+TE	2.61684	59.2298	40.7702
ZY108	Shanmai	31.746	+TE	8.39991	32.469	67.531
ZY183	Mazhamai	30.0595	+TE	6.2121	62.0362	37.9638
WXB89	Yuejin5hao	42.5595	+TE	8.64247	35.5549	64.4451
s187	Dalibanmang	44.3452	+TE	11.1275	38.2387	61.7613
s210	Sumai3hao	60.6151	-TE	0.0231795	1.82316	98.1768
WXB281	Zhoumai32	30.9524	-TE	0.219018	4.9485	95.0515
954072	954072	47.2211	-TE	0.246453	30.3059	69.6941
C2-1	4332	48.3135	-TE	0.303692	31.8676	68.1324
C3-2	TAA10	52.381	-TE	0.433727	19.3128	80.6872
DJ-5	Lankao906	78.7698	-TE	0.969798	58.4701	41.5299
G5-1	Gao5	38.4921	-TE	1.33943	42.6883	57.3117
jimai229	Jimai229	65.9722	-TE	1.45079	35.7889	64.2111
long6878-1	Chang6878	78.0754	-TE	1.73606	46.7192	53.2808
s209	Changzhi6406	50	-TE	1.93671	49.5913	50.4087
s211	Enmai4	61.7063	-TE	2.08474	58.9468	41.0532
s212	Lovrin 10	48.2143	-TE	2.10881	59.1091	40.8909
s295	jin50LP-82	97.9167	-TE	3.46476	2.88967	97.1103
s3753-1	Nongda3753	73.3135	-TE	4.35793	60.4679	39.5321
s48	Lumai23	18.5516	-TE	0.876888	26.2795	73.7205
s6554-2	Jingdong6	65.377	-TE	6.41871	62.142	37.858
SRR10766556	Ningchun4	62.8968	-TE	6.87701	65.4325	34.5675
SRR10766558	Jinan17	62.0029	-TE	7.02171	71.3056	28.6944
WXB101	Yannong21	69.4444	-TE	8.06403	91.1313	8.86872
WXB102	Yannong23	51.7857	-TE	8.73169	95.2229	4.77708
WXB114	Bonong6	69.7421	-TE	9.68116	101.502	-1.50165
WXB120	Dehongfumai8	76.5873	-TE	9.73182	77.1986	22.8014
WXB158	Luomai24	50.3968	-TE	18.0081	73.8735	26.1265
WXB168	Pingan9	47.2222	-TE	3.21549	50.4985	49.5015
WXB186	Tianmin298	82.1429	-TE	7.72097	85.0141	14.9859
WXB248	Zhengnong46	64.9802	-TE	10.5803	77.5231	22.4769
WXB259	Zhongyu6	73.1151	-TE	22.0241	76.1986	23.8014
WXB273	Zhoumai22	62.3997	-TE	1.45674	37.4107	62.5893
WXB291	Luomai7	88.9881	-TE	40.3845	84.5822	15.4178
WXB313	Yaomai16	51.5862	-TE	2.65523	52.5355	47.4645
WXB324	Heng4399	49.2063	-TE	2.95022	91.5784	8.42165
WXB329	Heng6632	84.2262	-TE	23.1718	57.1796	42.8204
WXB444	Xinong556	47.5198	-TE	0.839144	38.8617	61.1383
WXB279	Zhoumai30	33.5317	-TE	0.037851	25.3308	74.6692
XX-2	XX329	83.1349	-TE	28.2129	60.4192	39.5808
ZY-12	Apache	50	-TE	3.59926	65.4419	34.5581

## Sheet: Supplementary Table 6
Supplementary Table 6. The results list of yeast two-hybrid with CDS of TaGLYI7HapB as bait sequence
Wheat Gene	Wheat Description	Rice Gene
TraesCS1A02G099300	Chaperone protein dnaJ, putative	Os05g0156500
TraesCS1B02G298200	Ectonucleoside triphosphate diphosphohydrolase 1	Os10g0350500
TraesCS1D02G139500	Ras-related protein Rab-5C	Os10g0441800
TraesCS1D02G353300	Non-specific serine/threonine protein kinase	Os05g0530500
TraesCS2B02G233300	Protein THYLAKOID FORMATION1, chloroplastic	Os07g0558500
TraesCS2D02G304500	Glutathione S-transferase	Os04g0435500
TraesCS3B02G255300	SGT1A; phosphatase-related	Os01g0624500
TraesCS3B02G048900	NADPH-dependent aldehyde reductase 2, chloroplastic	Os03g0748100
TraesCS3D02G137200	encodes a GSK3/shaggy-like protein kinase	Os01g0205700
TraesCS4A02G098500	HSP20-like chaperones superfamily protein	Os03g0277100
TraesCS4A02G187300	Non-specific serine/threonine protein kinase	Os11g0134300
TraesCS4B02G067600	CBS domain containing protein, expressed	Os03g0737000
TraesCS4D02G072800	Beta-xylosidase, putative	Os11g0297800
TraesCS4D02G133800	Laccase	Os11g0708100
TraesCS4D02G157200	ATP-dependent Clp protease proteolytic subunit	Os03g0411500
TraesCS4D02G196100	Non-specific serine/threonine protein kinase	Os08g0484600
TraesCS5A02G193700	Mitochondrial outer membrane porin	Os09g0361400
TraesCS5B02G189000	Mitochondrial outer membrane porin	Os09g0361400
TraesCS5B02G539000	Derlin	Os03g0852200
TraesCS5D02G125500	Chaperone protein DNAj, putative	Os05g0334400
TraesCS5D02G135400	Fantastic four-like protein	Os12g0155100
TraesCS5D02G196100	Mitochondrial outer membrane porin	Os09g0361400
TraesCS6A02G203300	Cryptochrome-1	Os02g0573200
TraesCS6A02G252600	Mechanosensitive ion channel family protein	Os02g0668000
TraesCS6D02G141000	Non-specific serine/threonine protein kinase	Os02g0178000
TraesCS6D02G147700	Glycine cleavage system H family protein	Os02g0170100
TraesCS7A02G397100	Disease resistance protein (TIR-NBS-LRR class) family
TraesCS7A02G476200	BHLH transcription factor
TraesCS7A02G476300	Transcription factor
TraesCS7B02G009300	AT4g33690/T16L1_180
TraesCS7B02G034200	40S ribosomal protein S30	Os06g0172600
TraesCS7D02G151600	NADPH-dependent aldehyde reductase-like protein, chloroplastic	Os06g0185100
TraesCS7D02G206700	Chromatin remodeling protein-like	Os06g0255200
TraesCS7D02G413700	Subtilisin-like protease	Os06g0700000

## Sheet: Supplementary Table 7
Supplementary Table 7 PacBio data quality assessment
Reads number	Base number	Mean length	N50(bp)	Depth (X)
27947054	506,012,183,87	18106	18110	34.7

## Sheet: Supplementary Table 8
Supplementary Table 8 Hi-C data quality assessment
Total Reads	Total Paired	Total Paired Ratio (%)	Valid Pairs	Unique di-Tags	Effect Rate (%)
4549111286	976213571	21.46	416306884	416068448	9.15

## Sheet: Supplementary Table 9
Supplementary Table 9. Produced sequence data
Libraries	Insert size	Total data (G)	Read length (bp)	Sequence coverage (X)
HIFI reads	15K	506	--	34.7
HiC reads	350bp	834.39	150	57.23

## Sheet: Supplementary Table 10
Supplementary Table 10 Statistics of gene function annotation in JIN50
Database		JIN50
		Number	Percent（%）
NR		137960	98.2
Swiss-Prot		79665	56.7
KEGG		83225	59.3
InterPro	All	136157	97
	Pfam	102555	73
	GO	85919	61.2
Annotated		139807	99.6
Total		140422	-

[truncated: 9 more sheets: Supplementary Table 11, Supplementary Table 12, Supplementary Table 13, Supplementary Table 14, Supplementary Table 15, Supplementary Table 1 6, Supplementary Table 17, Supplementary Table 18, Supplementary Table 19]
